# Supplementary material for: CD38 identifies pre-activated CD8+ T cells which can be reinvigorated by anti-PD-1 blockade in human lung cancer
Source: Springer Nature journal article supplement (doi:10.1007/s00262-021-02949-w), 2021-05-02

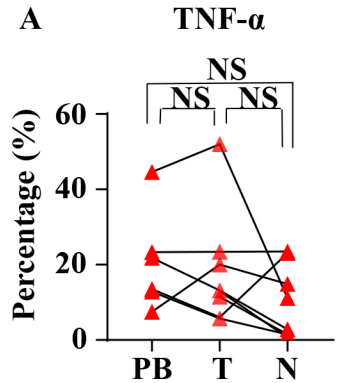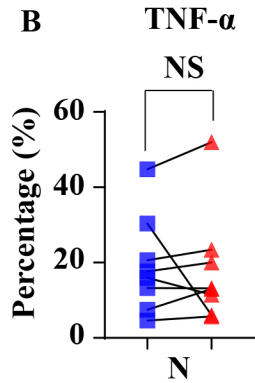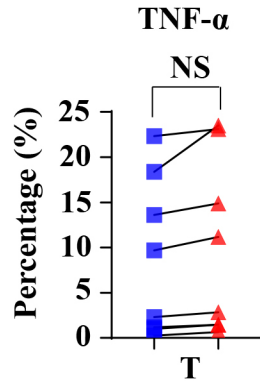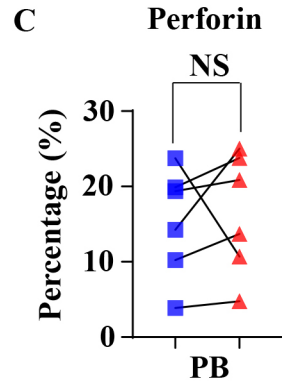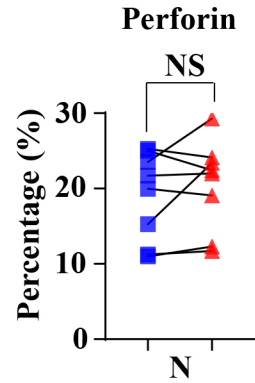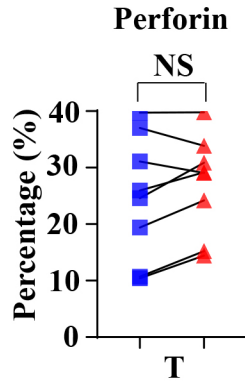

Supplement: MOESM3 [file 19124764]
