# Supplementary material for: CD38 identifies pre-activated CD8+ T cells which can be reinvigorated by anti-PD-1 blockade in human lung cancer
Source: Springer Nature journal article supplement (doi:10.1007/s00262-021-02949-w), 2021-05-02
Supplement: MOESM5 [file 19124764]

**Supplementary Table 1. Characteristics of the Patients**

|                                |                  |
|--------------------------------|------------------|
| Patient number                 | N=51             |
| Age at enrollment—years        |                  |
| Mean $\pm$ SD                  | 64.27 $\pm$ 8.41 |
| Median (range)                 | 66 (41-83)       |
| Sex-No. (%)                    |                  |
| Female                         | 19 (37)          |
| Male                           | 32 (63)          |
| Histologic diagnosis-No. (%)   |                  |
| Adenocarcinoma                 | 32 (63)          |
| Squamous-cell carcinoma        | 17 (33)          |
| Other                          | 2 (4)            |
| Clinical disease stage-No. (%) |                  |
| I                              | 37 (72)          |
| II                             | 7 (14)           |
| III                            | 7 (14)           |
| Smoking status-No. (%)         |                  |
| Never                          | 28 (55)          |
| Former or current              | 21 (43)          |
